# Supplementary material for: The structure of 3-(diethylborylethynyl)pyridine: a nonplanarly arranged cyclic trimer
Source: Royal Society of Chemistry journal article supplement (doi:10.1039/c4ob00849a), 2014-01-01
Supplement: c4ob00849a1.pdf [file c4ob00849a1.pdf]

## Supplementary Information

### Structure of 3-(Diethylborylethynyl)pyridine: Nonplanarly Cyclic Trimer

Shigeharu Wakabayashi,<sup>\*a</sup> Mitsumi Kuse,<sup>a</sup> Aimi Kida,<sup>a</sup> Seiji Komeda,<sup>b</sup>

Kazuyuki Tatsumi,<sup>c</sup> and Yoshikazu Sugihara<sup>d</sup>

<sup>a</sup>*Department of Clinical Nutrition, Faculty of Health Science, Suzuka University of Medical Science, Suzuka, Mie 510-0293, Japan*

<sup>b</sup>*Department of Pharmaceutical Sciences, Faculty of Pharmaceutical Sciences, Suzuka University of Medical Science, Suzuka, Mie 513-8670, Japan*

<sup>c</sup>*Department of Chemistry, Graduate School of Science and Research Center for Materials Science, Nagoya University, Furo-cho, Chikusa-ku, Nagoya 464-8602, Japan*

<sup>d</sup>*Department of Chemistry, Faculty of Science, Yamaguchi University, Yamaguchi 753-8512, Japan*

s-waka@suzuka-u.ac.jp

#### Contents

|       |                                                                                                     |
|-------|-----------------------------------------------------------------------------------------------------|
| S2    | General methods.                                                                                    |
| S3    | <b>Figure S1 to S2.</b> <sup>1</sup> H NMR, <sup>13</sup> C NMR spectra of <b>2a</b> .              |
| S4    | <b>Figure S3 to S4.</b> <sup>1</sup> H NMR, <sup>13</sup> C NMR spectra of <b>2b</b> .              |
| S5    | <b>Figure S5.</b> ESI-MS spectrum of <b>2b</b> .<br><b>Figure S6.</b> NOESY spectrum of <b>2b</b> . |
| S6    | <b>Figure S7.</b> <sup>11</sup> B NMR spectrum of <b>2b</b> .                                       |
| S7-S9 | Cartesian coordinates of optimized structures of the cyclic trimer of <b>2b</b> .                   |

**General methods.** Melting points are uncorrected. All  $^1\text{H}$  and  $^{13}\text{C}$  NMR spectra in  $\text{CDCl}_3$  were recorded at 400 and 100 MHz, respectively, on a Varian 400-MR instrument. The chemical shifts are described as values in ppm relative to a  $\text{Si}(\text{CH}_3)_4$  standard for  $^1\text{H}$  NMR.  $^{11}\text{B}$  NMR spectra in  $\text{CDCl}_3$  were recorded at 192 MHz using  $\text{BF}_3$ -etherate as internal standard on Jeol JNM-A600. Infrared spectra were recorded with a Shimadzu IRAffinity-1 Fourier transform infrared spectrophotometer. EI mass spectra were recorded at a voltage of 20 eV on a Jeol JMS T100GCV mass spectrometer. ESIMS spectra were recorded in a mixed solution of  $\text{CH}_3\text{CN}$  and THF on an PerkinElmer Sciex API 300 triple quadrupole LC/MS/MS mass spectrometer. UV/Vis spectra were recorded on a Hitachi U-3000 spectrometer. Vapor pressure osmometry was performed using Knauer A0280 and K-7000 instruments. Analytical thin-layer chromatography was conducted on a plate coated with silicagel plate (0.25 mm thickness), and visualization was effected with short wavelength UV light (254 nm). Most reactions were carried out in septum-capped, oven-dried, and argon-purged flasks. All reagents were used directly as obtained commercially unless otherwise noted.

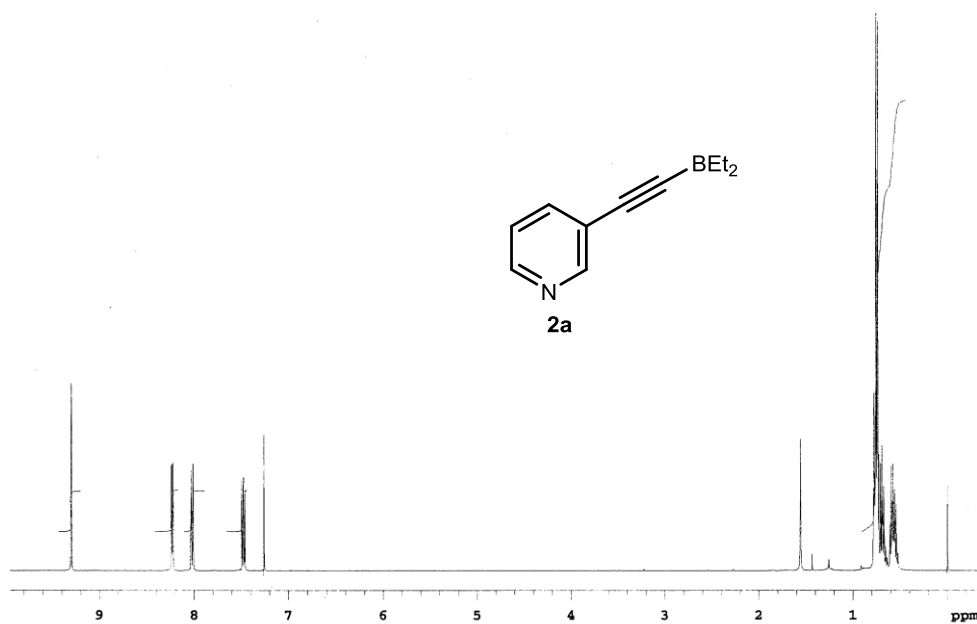

Figure S1. <sup>1</sup>H NMR spectrum of 2a (400 MHz, CDCl<sub>3</sub>)

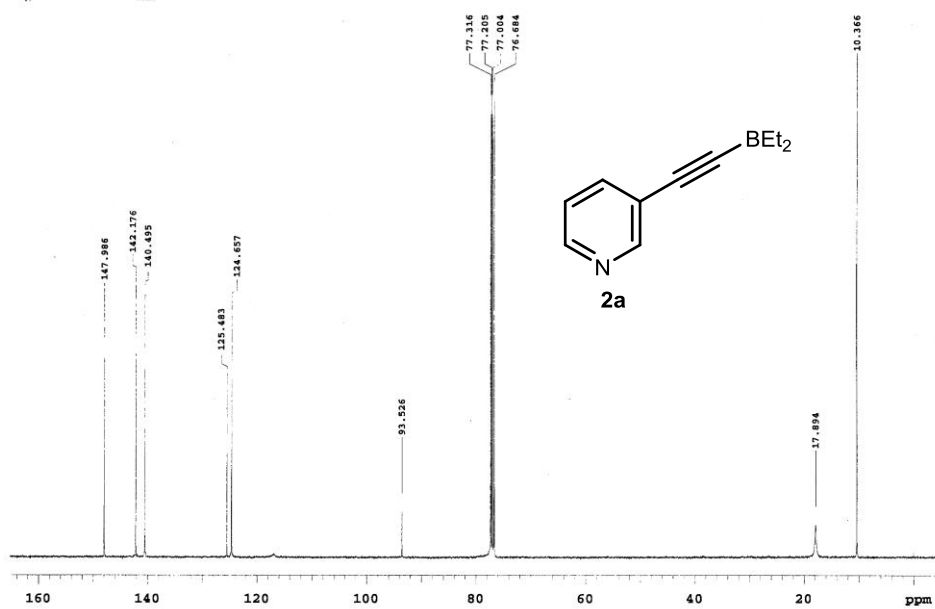

Figure S2. <sup>13</sup>C NMR spectrum of 2a (100 MHz, CDCl<sub>3</sub>)

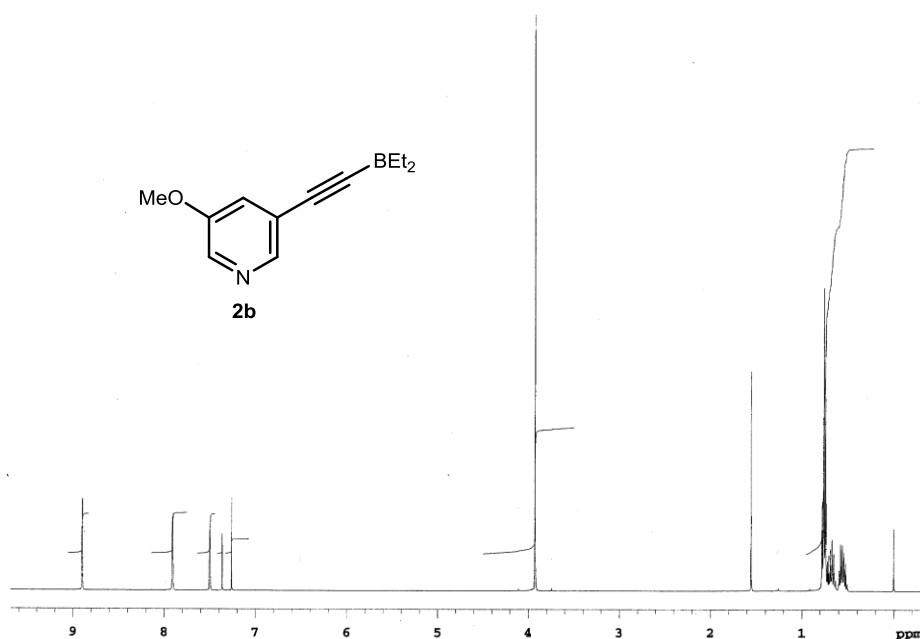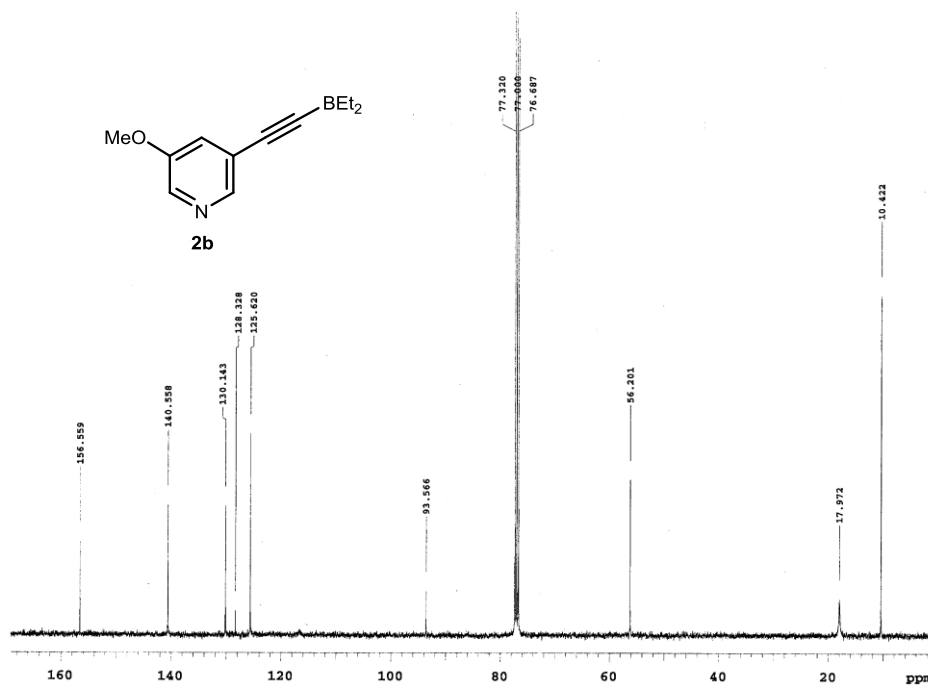

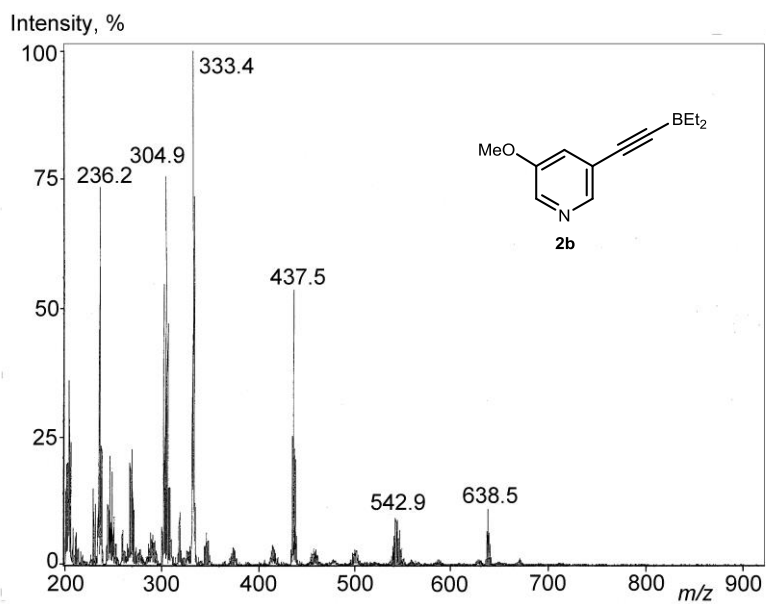

**Figure S5.** ESI-MS spectrum of **2b** in THF-CH<sub>3</sub>CN in the presence of LiCl.

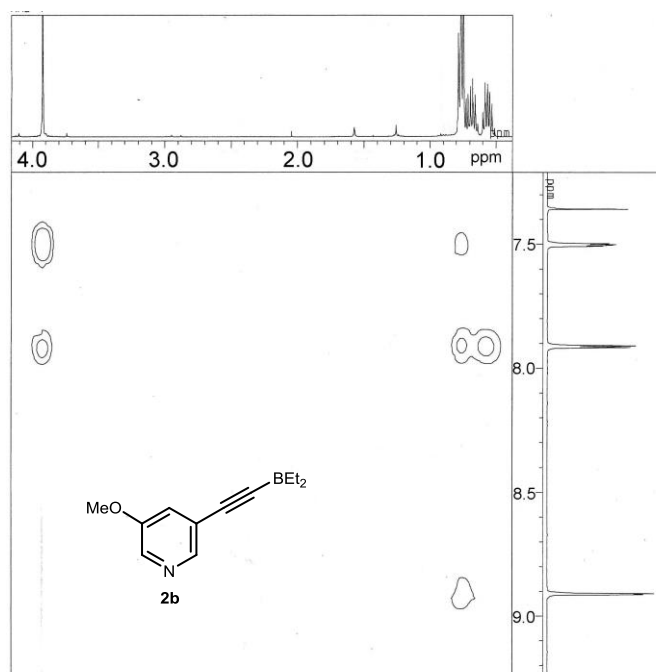

**Figure S6.** NOESY spectrum of **2b** (400 MHz, CDCl<sub>3</sub>)

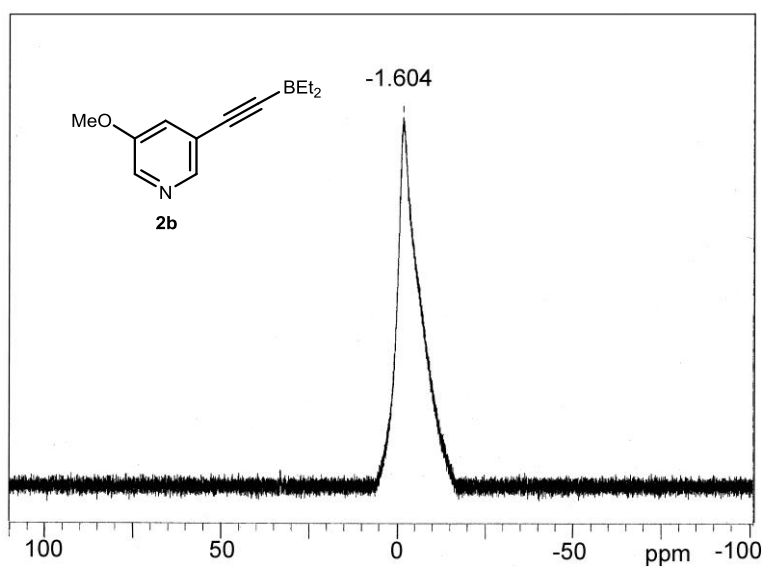

**Figure S7.**  $^{11}\text{B}$  NMR spectrum of **2b** (192 MHz,  $\text{CDCl}_3$ )

## Cartesian coordinates of optimized structures of the cyclic trimer of 2b

Method: RB3LYP

Basis set: 6-31G(D)

Number of shells: 276

Number of basis functions: 771

Multiplicity: 1

SCF model:

A restricted hybrid HF-DFT SCF calculation will be performed using Pulay DIIS + Geometric Direct Minimization

SCF total energy: -1865.1672170 hartrees

|       |     | Cartesian Coordinates (Angstroms) |            |           |
|-------|-----|-----------------------------------|------------|-----------|
| Atom  |     | X                                 | Y          | Z         |
| ----- |     | -----                             | -----      | -----     |
| 1 H   | H1  | 4.0147385                         | 3.9005053  | 0.0000000 |
| 2 C   | C1  | 2.9339724                         | 3.9663493  | 0.0000000 |
| 3 N   | N3  | 0.1521540                         | 4.0672493  | 0.0000000 |
| 4 C   | C2  | 2.1801509                         | 2.7769584  | 0.0000000 |
| 5 C   | C6  | 2.2682778                         | 5.1908306  | 0.0000000 |
| 6 C   | C5  | 0.8702284                         | 5.2019195  | 0.0000000 |
| 7 C   | C3  | 0.7805790                         | 2.8780894  | 0.0000000 |
| 8 H   | H5  | 0.3284929                         | 6.1377411  | 0.0000000 |
| 9 H   | H3  | 0.1442481                         | 2.0039800  | 0.0000000 |
| 10 C  | C7  | 2.8274874                         | 1.5125440  | 0.0000000 |
| 11 C  | C8  | 3.4512059                         | 0.4615117  | 0.0000000 |
| 12 B  | B1  | 4.3988545                         | -0.8058460 | 0.0000000 |
| 13 N  | N1  | 3.4462642                         | -2.1653938 | 0.0000000 |
| 14 C  | C10 | 1.9679731                         | -4.5240692 | 0.0000000 |
| 15 C  | C11 | 4.0698802                         | -3.3545997 | 0.0000000 |
| 16 C  | C12 | 2.1022091                         | -2.1150460 | 0.0000000 |
| 17 C  | C13 | 1.3148410                         | -3.2765453 | 0.0000000 |
| 18 C  | C14 | 3.3612522                         | -4.5598016 | 0.0000000 |
| 19 H  | H8  | 5.1511933                         | -3.3533537 | 0.0000000 |
| 20 H  | H9  | 1.6633735                         | -1.1269125 | 0.0000000 |
| 21 H  | H12 | 1.3705675                         | -5.4271181 | 0.0000000 |

|      |     |            |            |            |
|------|-----|------------|------------|------------|
| 22 C | C15 | -0.1038421 | -3.2049479 | 0.0000000  |
| 23 C | C16 | -1.3259221 | -3.2195878 | 0.0000000  |
| 24 B | B2  | -2.8973104 | -3.4065967 | 0.0000000  |
| 25 N | N2  | -3.5984182 | -1.9018555 | 0.0000000  |
| 26 C | C18 | -4.9019454 | 0.5577200  | 0.0000000  |
| 27 C | C19 | -4.9401086 | -1.8473198 | 0.0000000  |
| 28 C | C20 | -2.8827881 | -0.7630435 | 0.0000000  |
| 29 C | C21 | -3.4949920 | 0.4995869  | 0.0000000  |
| 30 C | C22 | -5.6295301 | -0.6310291 | 0.0000000  |
| 31 H | H14 | -5.4796861 | -2.7843874 | 0.0000000  |
| 32 H | H15 | -1.8076216 | -0.8770674 | 0.0000000  |
| 33 H | H18 | -5.3853059 | 1.5266128  | 0.0000000  |
| 34 C | C23 | -2.7236452 | 1.6924039  | 0.0000000  |
| 35 C | C24 | -2.1252837 | 2.7580762  | 0.0000000  |
| 36 B | B3  | -1.5015441 | 4.2124428  | 0.0000000  |
| 37 C | C4  | 5.3107353  | -0.8401264 | -1.3606592 |
| 38 H | H4  | 6.0075408  | -1.6936202 | -1.3235207 |
| 39 H | H7  | 5.9567919  | 0.0498188  | -1.3325627 |
| 40 C | C9  | 4.5561960  | -0.8631767 | -2.6984349 |
| 41 H | H16 | 3.9358741  | -1.7638447 | -2.8015174 |
| 42 H | H21 | 5.2369455  | -0.8431859 | -3.5595291 |
| 43 H | H22 | 3.8852470  | 0.0000000  | -2.7870929 |
| 44 C | C17 | 5.3107353  | -0.8401264 | 1.3606592  |
| 45 H | H2  | 6.0075408  | -1.6936202 | 1.3235207  |
| 46 H | H24 | 5.9567919  | 0.0498188  | 1.3325627  |
| 47 C | C25 | 4.5561960  | -0.8631767 | 2.6984349  |
| 48 H | H23 | 3.9358741  | -1.7638447 | 2.8015174  |
| 49 H | H25 | 3.8852470  | 0.0000000  | 2.7870929  |
| 50 H | H26 | 5.2369455  | -0.8431859 | 3.5595291  |
| 51 C | C26 | -3.3829384 | -4.1791685 | 1.3606592  |
| 52 H | H10 | -4.4704885 | -4.3558728 | 1.3235207  |
| 53 H | H28 | -2.9352516 | -5.1836425 | 1.3325627  |
| 54 C | C27 | -3.0256309 | -3.5141931 | 2.6984349  |
| 55 H | H27 | -1.9426235 | -3.3647226 | 2.7870929  |
| 56 H | H29 | -3.3486932 | -4.1137349 | 3.5595291  |
| 57 H | H30 | -3.4954714 | -2.5266446 | 2.8015174  |



|      |     |            |            |            |
|------|-----|------------|------------|------------|
| 58 C | C28 | -3.3829384 | -4.1791685 | -1.3606592 |
| 59 H | H13 | -4.4704885 | -4.3558728 | -1.3235207 |
| 60 H | H31 | -2.9352516 | -5.1836425 | -1.3325627 |
| 61 C | C29 | -3.0256309 | -3.5141931 | -2.6984349 |
| 62 H | H32 | -3.4954714 | -2.5266446 | -2.8015174 |
| 63 H | H33 | -3.3486932 | -4.1137349 | -3.5595291 |
| 64 H | H34 | -1.9426235 | -3.3647226 | -2.7870929 |
| 65 C | C30 | -1.9277969 | 5.0192948  | 1.3606592  |
| 66 H | H19 | -1.5370523 | 6.0494930  | 1.3235207  |
| 67 H | H36 | -3.0215403 | 5.1338238  | 1.3325627  |
| 68 C | C31 | -1.5305651 | 4.3773698  | 2.6984349  |
| 69 H | H35 | -0.4404027 | 4.2904893  | 2.8015174  |
| 70 H | H37 | -1.9426235 | 3.3647226  | 2.7870929  |
| 71 H | H38 | -1.8882524 | 4.9569208  | 3.5595291  |
| 72 C | C32 | -1.9277969 | 5.0192948  | -1.3606592 |
| 73 H | H20 | -3.0215403 | 5.1338238  | -1.3325627 |
| 74 H | H40 | -1.5370523 | 6.0494930  | -1.3235207 |
| 75 C | C33 | -1.5305651 | 4.3773698  | -2.6984349 |
| 76 H | H39 | -1.9426235 | 3.3647226  | -2.7870929 |
| 77 H | H41 | -0.4404027 | 4.2904893  | -2.8015174 |
| 78 H | H42 | -1.8882524 | 4.9569208  | -3.5595291 |
| 79 O | O1  | 4.1236159  | -5.6801529 | 0.0000000  |
| 80 C | C34 | 3.4633594  | -6.9420247 | 0.0000000  |
| 81 H | H11 | 2.8430092  | -7.0674905 | 0.8961157  |
| 82 H | H43 | 4.2575150  | -7.6894853 | 0.0000000  |
| 83 H | H44 | 2.8430092  | -7.0674905 | -0.8961157 |
| 84 O | O2  | -6.9809646 | -0.7310796 | 0.0000000  |
| 85 C | C35 | -7.7436494 | 0.4716551  | 0.0000000  |
| 86 H | H17 | -7.5421309 | 1.0716271  | 0.8961157  |
| 87 H | H45 | -8.7880471 | 0.1576266  | 0.0000000  |
| 88 H | H46 | -7.5421309 | 1.0716271  | -0.8961157 |
| 89 O | O3  | 2.8573488  | 6.4112326  | 0.0000000  |
| 90 C | C36 | 4.2802900  | 6.4703696  | 0.0000000  |
| 91 H | H6  | 4.6991218  | 5.9958634  | 0.8961157  |
| 92 H | H47 | 4.5305321  | 7.5318588  | 0.0000000  |
| 93 H | H48 | 4.6991218  | 5.9958634  | -0.8961157 |
